# Supplementary material
Source: ML conference proceedings conference paper supplement (https://proceedings.neurips.cc/paper_files/paper/2016/hash/5680522b8e2bb01943234bce7bf84534-Abstract.html)
Supplement: Supplementary file 1 [file 5680522b8e2bb01943234bce7bf84534-Supplemental.zip]

Archive with 1 entries (1 files):
- Paper 1185/examples-learn-criticize-app.pdf
